# Supplementary material for: A randomized, double-blinded study evaluating effect of matcha green tea on human fecal microbiota
Source: PubMed Central journal article supplement — J Clin Biochem Nutr. 2022 Nov 23;72(2):165–70. doi: 10.3164/jcbn.22-81 (PMC10017316; doi:10.3164/jcbn.22-81), 2022-11-23
Supplement: jcbn22-81_1.pdf [file jcbn22-81_1.pdf]

**Supplemental Table 1.** Bacterial genera whose relative abundances changed in both the placebo and the MGT groups during the experimental period

| Taxonomy                             |                               |                                     | Placebo group            |                           |                | MGT group                |                           |                |
|--------------------------------------|-------------------------------|-------------------------------------|--------------------------|---------------------------|----------------|--------------------------|---------------------------|----------------|
| Order                                | Family                        | Genus                               | Pre-consumption (Week 0) | Post-consumption (Week 2) | <i>p</i> value | Pre-consumption (Week 0) | Post-consumption (Week 2) | <i>p</i> value |
| Common difference with placebo group |                               |                                     |                          |                           |                |                          |                           |                |
| Actinomycetales                      | <i>Micrococcaceae</i>         | <i>Rothia</i>                       | 0.012 ± 0.021            | 0.002 ± 0.004             | 0.05*          | 0.026 ± 0.028            | 0.004 ± 0.005             | <0.01**        |
| Bacteroidales                        | [ <i>Paraprevotellaceae</i> ] | <i>Paraprevotella</i>               | 0.456 ± 0.899            | 0.318 ± 0.696             | 0.02*          | 0.311 ± 0.274            | 0.150 ± 0.604             | 0.02*          |
| Bacteroidales                        | <i>Bacteroidaceae</i>         | <i>Bacteroides</i>                  | 27.532 ± 10.195          | 31.658 ± 10.046           | 0.01*          | 24.409 ± 5.971           | 33.068 ± 8.471            | <0.01**        |
| Clostridiales                        | Unclassified                  | Unclassified                        | 0.871 ± 0.682            | 0.351 ± 0.304             | <0.01**        | 0.808 ± 0.467            | 0.411 ± 0.486             | <0.01**        |
| Clostridiales                        | <i>Christensenellaceae</i>    | Unclassified                        | 0.841 ± 1.325            | 0.046 ± 0.078             | <0.01**        | 1.690 ± 1.474            | 0.094 ± 0.213             | <0.01**        |
| Clostridiales                        | <i>Dehalobacteriaceae</i>     | <i>Dehalobacterium</i>              | 0.009 ± 0.012            | 0.003 ± 0.007             | 0.02*          | 0.013 ± 0.011            | 0.003 ± 0.004             | <0.01**        |
| Clostridiales                        | <i>Eubacteriaceae</i>         | <i>Pseudoramibacter_Eubacterium</i> | 0.010 ± 0.017            | 0.001 ± 0.004             | 0.04*          | 0.011 ± 0.009            | 0.003 ± 0.008             | 0.01*          |
| Clostridiales                        | <i>Ruminococcaceae</i>        | <i>Clostridium</i>                  | 0.014 ± 0.020            | 0.002 ± 0.004             | 0.02*          | 0.017 ± 0.014            | 0.003 ± 0.005             | <0.01**        |
| Clostridiales                        | <i>Ruminococcaceae</i>        | <i>Faecalibacterium</i>             | 4.631 ± 2.886            | 6.486 ± 4.183             | 0.03*          | 5.060 ± 3.547            | 6.843 ± 4.526             | 0.04*          |
| Clostridiales                        | <i>Ruminococcaceae</i>        | <i>Oscillospira</i>                 | 2.332 ± 1.925            | 1.262 ± 1.304             | 0.03*          | 3.396 ± 2.350            | 1.508 ± 1.881             | 0.03*          |
| Clostridiales                        | Other                         | Other                               | 0.082 ± 0.072            | 0.022 ± 0.020             | <0.01**        | 0.109 ± 0.071            | 0.051 ± 0.065             | 0.04*          |
| Coriobacteriales                     | <i>Coriobacteriaceae</i>      | Unclassified                        | 0.038 ± 0.051            | 0.007 ± 0.013             | 0.02*          | 0.062 ± 0.058            | 0.028 ± 0.058             | 0.02*          |
| Desulfovibrionales                   | <i>Desulfovibrionaceae</i>    | <i>Desulfovibrio</i>                | 0.056 ± 0.062            | 0.013 ± 0.018             | 0.03*          | 0.091 ± 0.074            | 0.036 ± 0.108             | 0.01*          |
| Enterobacteriales                    | <i>Enterobacteriaceae</i>     | <i>Enterobacter</i>                 | 0.110 ± 0.157            | 0.008 ± 0.024             | 0.01*          | 0.229 ± 0.178            | 0.006 ± 0.014             | <0.01**        |
| Enterobacteriales                    | <i>Enterobacteriaceae</i>     | <i>Klebsiella</i>                   | 1.989 ± 2.637            | 0.249 ± 0.722             | 0.02*          | 3.669 ± 2.747            | 0.098 ± 0.132             | <0.01**        |
| Enterobacteriales                    | <i>Enterobacteriaceae</i>     | <i>Serratia</i>                     | 0.358 ± 0.794            | 0.023 ± 0.050             | 0.01*          | 0.519 ± 1.550            | 0.043 ± 0.088             | <0.01**        |
| Lactobacillales                      | <i>Enterococcaceae</i>        | <i>Enterococcus</i>                 | 0.166 ± 0.329            | 0.090 ± 0.193             | 0.04*          | 0.172 ± 0.115            | 0.053 ± 0.123             | <0.01**        |
| Methanobacteriales                   | <i>Methanobacteriaceae</i>    | <i>Methanobrevibacter</i>           | 0.074 ± 0.123            | 0.001 ± 0.002             | 0.02*          | 0.150 ± 0.152            | 0.002 ± 0.006             | <0.01**        |
| RF39                                 | Unclassified                  | Unclassified                        | 0.012 ± 0.019            | <0.001                    | 0.02*          | 0.028 ± 0.028            | 0.003 ± 0.006             | <0.01**        |
| Synergistales                        | <i>Synergistaceae</i>         | <i>Cloacibacillus</i>               | 0.048 ± 0.081            | <0.001                    | 0.02*          | 0.110 ± 0.096            | 0.009 ± 0.036             | <0.01**        |
| Verrucomicrobiales                   | <i>Verrucomicrobiaceae</i>    | <i>Akkermansia</i>                  | 1.355 ± 1.964            | 0.783 ± 2.808             | 0.05*          | 3.365 ± 2.667            | 0.850 ± 2.068             | <0.01**        |
| Victivallales                        | <i>Victivallaceae</i>         | <i>Victivallis</i>                  | 0.033 ± 0.059            | <0.001                    | 0.02*          | 0.069 ± 0.061            | 0.001 ± 0.006             | <0.01**        |

\**p*<0.05, \*\**p*<0.01.
